# Supplementary material for: Prosthetic Management of a patient with an Ocular Defect
Source: Hindawi journal article supplement (doi:10.1155/2021/9925945), 2009-01-01
Supplement: f1 [file 9925945.f1.zip]

Please circle the number between 1 and 7 which you feel best fits the following statements. This refers to your usual way of life within the last week. 1 indicates “strongly disagree” and 7 indicates “strongly agree.”

**Read and circle a number. Strongly Disagree → Strongly Agree 1.**

- |                                                                              |                  |
|------------------------------------------------------------------------------|------------------|
| 1. My motivation is lower when I am fatigued.                                | 1 2 3 4 5 6 7 2. |
| 2. Exercise brings on my fatigue.                                            | 1 2 3 4 5 6 7 3. |
| 3. I am easily fatigued.                                                     | 1 2 3 4 5 6 7 4. |
| 4. Fatigue interferes with my physical functioning.                          | 1 2 3 4 5 6 7 5. |
| 5. Fatigue causes frequent problems for me.                                  | 1 2 3 4 5 6 7 6. |
| 6. My fatigue prevents sustained physical functioning.                       | 1 2 3 4 5 6 7 7. |
| 7. Fatigue interferes with carrying out certain duties and responsibilities. | 1 2 3 4 5 6 7 8. |
| 8. Fatigue is among my most disabling symptoms.                              | 1 2 3 4 5 6 7 9. |
| 9. Fatigue interferes with my work, family, or social life.                  | 1 2 3 4 5 6 7    |
