# Supplementary material for: Comparing the Effect of Aromatherapy with Peppermint and Lavender Essential Oils on Fatigue of Cardiac Patients: A Randomized Controlled Trial
Source: Evid Based Complement Alternat Med. 2021 Sep 14;2021:9925945. doi: 10.1155/2021/9925945 (PMC8457936; doi:10.1155/2021/9925945)
Supplement: Supplementary Materials — 1. Analysis of lavender extract compounds. 2. Analysis of peppermint extract compounds. 3. FSS questionnaire. [file 9925945.f1.zip]

Archive with 4 entries (4 files):
- 9925945.f1/Analysis of  Peppermint extract compounds.docx
- 9925945.f1/Analysis of lavender extract compounds.docx
- 9925945.f1/FSS Questionaire (1).pdf
- 9925945.f1/Supplementary description_9925945.docx
